# Supplementary material for: Understanding the effect of drug-resistant mutations of HIV-1 intasome on raltegravir action through molecular modeling study
Source: Royal Society of Chemistry journal article supplement (doi:10.1039/c2mb25114k), 2012-04-20
Supplement: c2mb25114k.pdf [file c2mb25114k.pdf]

# Supporting Information For

## Understanding the effect of drug-resistant mutations of the HIV-1 intasome on the raltegravir action through molecular modeling study

Weiwei Xue<sup>1</sup>, Ji Qi<sup>2</sup>, Ying Yang<sup>1</sup>, Xiaojie Jin<sup>1</sup>, Huanxiang Liu<sup>3</sup>, Xiaojun Yao<sup>1,4\*</sup>

<sup>1</sup>State Key Laboratory of Applied Organic Chemistry, Department of Chemistry, Lanzhou  
University, Lanzhou 730000, China

<sup>2</sup>Institute of Modern Physics, Chinese Academy of Sciences, Lanzhou 730000, China

<sup>3</sup>School of Pharmacy, Lanzhou University, Lanzhou 730000, China

<sup>4</sup>Key Lab of Preclinical Study for New Drugs of Gansu Province, Lanzhou University,  
Lanzhou 730000, China

\* Corresponding author

Tel.: +86-931-891-2578

Fax: +86-931-891-2582

E-mail: [xjyao@lzu.edu.cn](mailto:xjyao@lzu.edu.cn)

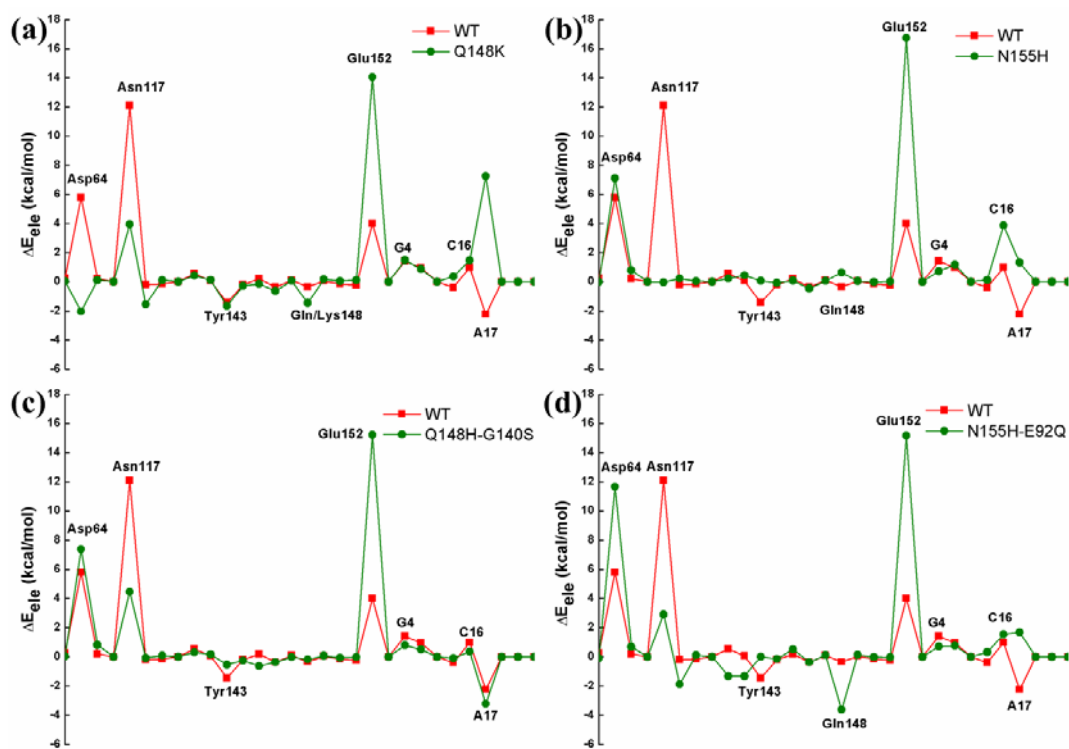

**Figure S1.** The nonbonded intermolecular electrostatic ( $\Delta E_{ele}$ ) interactions between intasome (residue in the active site) with raltegravir. Red lines represent the wild-type model, and green lines represent the mutant model.

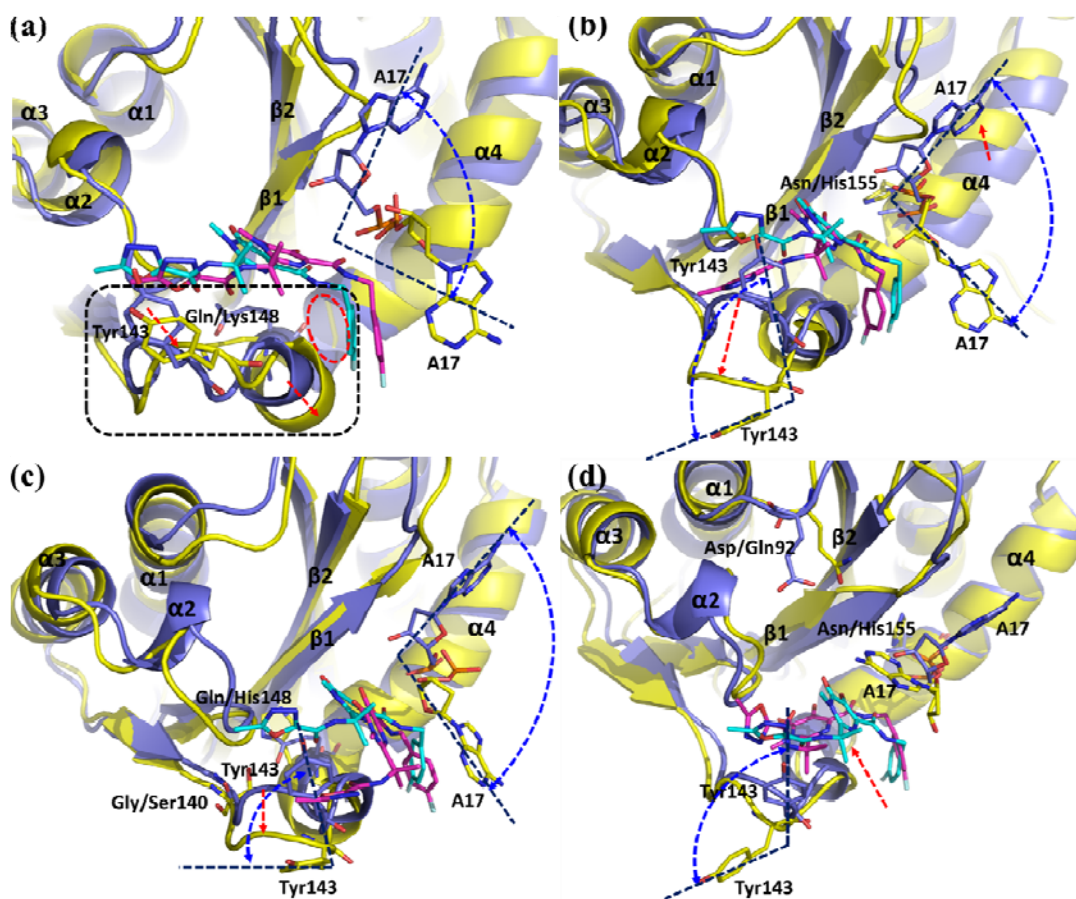

**Figure S2.** Superimposition of the MD-simulated structures of the wild-type HIV-1 intasome-raltegravir complex and (a) Q148K, (b) N155H, (c) Q148H-G140S and (d) N155H-E92Q mutant. Cartons of the wide-type (purple) and mutant (yellow) in the MD-simulated structures are shown. Raltegravir is shown as a stick representation in the wild-type (cyan) and mutant (pink) systems.

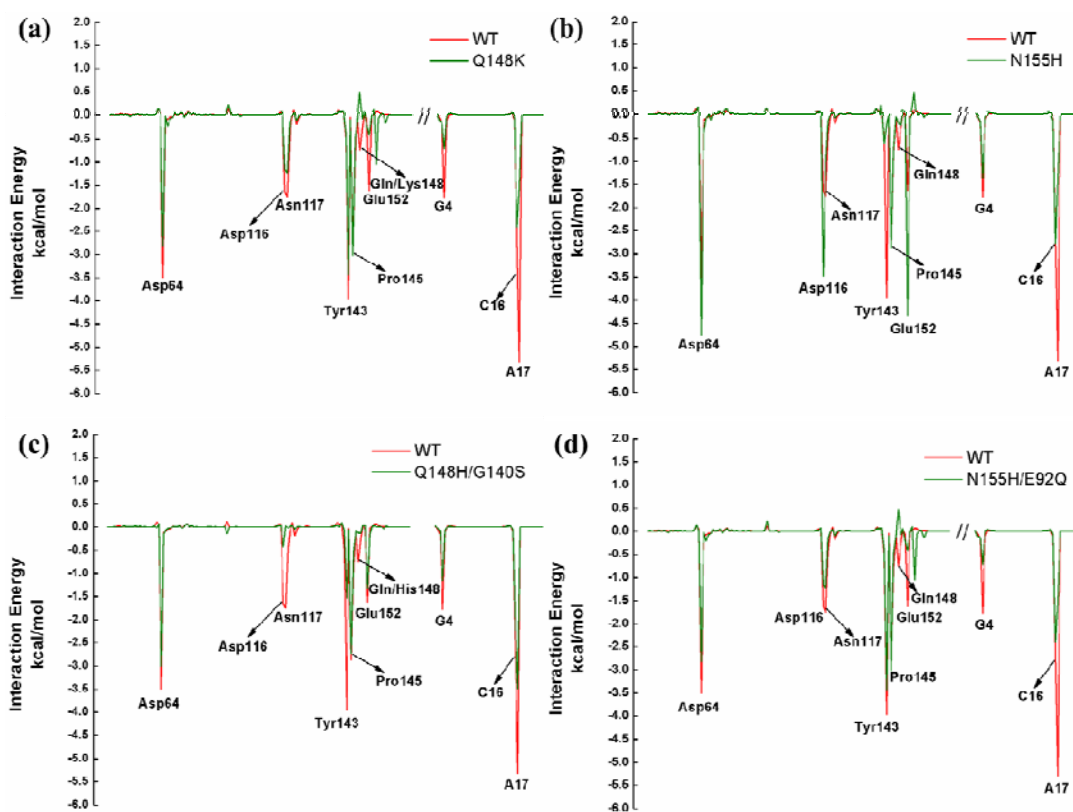

**Figure S3.** Intermolecular ligand receptor (per-residue) interaction spectrum of the wild-type and mutant intasome-raltegravir complexes according to the MM-GBSA method. Red lines represent the wild-type model, and green lines represent the mutant model.

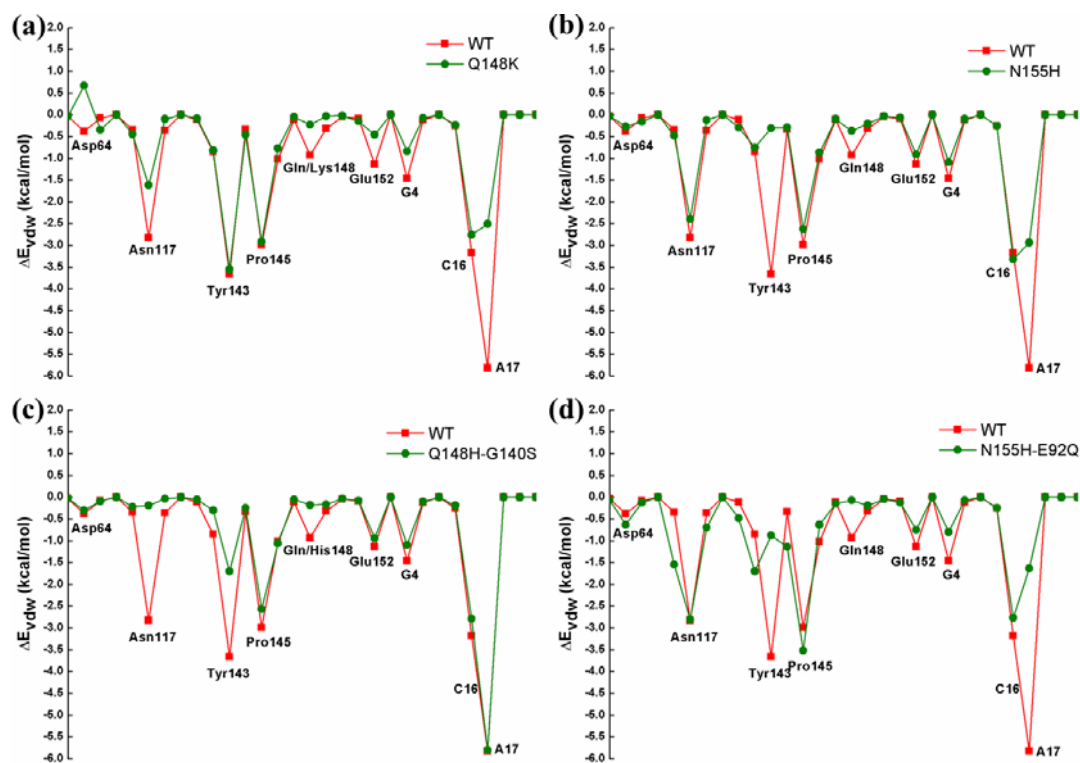

**Figure S4.** The nonbonded intermolecular van der Waals ( $\Delta E_{vdw}$ ) interactions between intasome (residue in the active site) with raltegravir. Red lines represent the wild-type model, and green lines represent the mutant model.

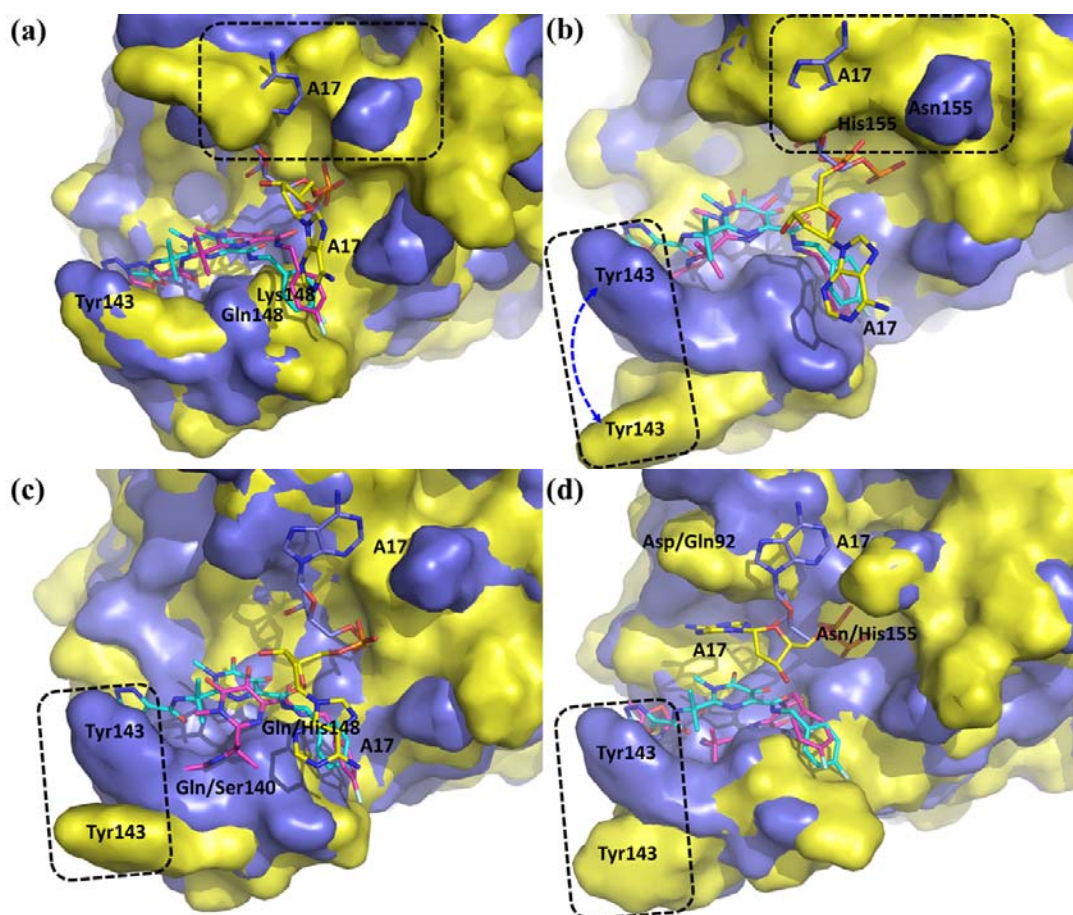

**Figure S5.** The molecular surface superimpositions of the wild-type (purple) and (a) Q148K, (b) N155H, (c) Q148H-G140S and (d) N155H-E92Q mutant (yellow) HIV-1 integrase active site. Purple (wild-type) and yellow (mutant) stick representations are shown for the viral DNA 3' adenosine. Raltegravir is also shown as a stick representation in the wild-type (cyan) and mutant (pink) systems.
